# Supplementary material
Source: Springer Nature journal article supplement (http://www.springermedizin.de/resource/supplementary/12937_2004_28_MOESM6_ESM.doc/25654288)
Supplement: MOESM6 [file 25654288]

|  |
| --- |
